# Supplementary material for: The extended impact of the COVID-19 pandemic on medical imaging case volumes: a retrospective study
Source: PeerJ. 2025 Mar 5;13:e18987. doi: 10.7717/peerj.18987 (PMC11890034; doi:10.7717/peerj.18987)
Supplement: Supplemental Information 1 [file peerj-13-18987-s001.xlsx]

## Sheet: Sheet1
	Control - 2019												Cohort - 2020												Cohort - 2021												Cohort - 2022												Total
	Jan	Feb	Mar	Apr	May	Jun	Jul	Aug	Sep	Oct	Nov	Dec	Jan	Feb	Mar	Apr	May	Jun	Jul	Aug	Sep	Oct	Nov	Dec	Jan	Feb	Mar	Apr	May	Jun	Jul	Aug	Sep	Oct	Nov	Dec	Jan	Feb	Mar	Apr	May	Jun	Jul	Aug	Sep	Oct	Nov	Dec
BMD\CR	87	120	126	138	74	70	99	67	89	101	86	126	131	98	74	1	4	26	43	57	60	79	55	88	23	1	0	75	39	83	40	77	88	83	94	105	75	83	117	16	62	110	48	89	85	85	87	88	3552
CT	1529	1420	1674	1681	1502	1477	1768	1585	1455	1658	1644	1662	1706	1655	1422	905	1203	1640	1893	1910	2011	1970	1969	2003	2094	1784	2123	1882	2090	2445	2228	2155	1780	1907	1877	2172	2056	1940	2223	1931	2249	2191	2196	2385	2185	2179	2067	2195	89676
DX	5725	5789	7437	7725	8279	7882	8647	7525	7184	9246	10566	9714	8923	8428	7388	3951	5020	6435	7243	8654	8419	8320	8714	8692	8710	7890	9316	7652	8252	10797	9512	9600	7083	8514	8821	9272	8553	8482	9682	8549	9244	9846	9606	9902	9454	9706	9684	10190	404223
MG	89	59	88	87	68	65	107	31	71	191	123	172	104	113	73	9	5	52	106	107	122	77	101	129	138	126	135	87	59	113	68	112	120	138	126	142	96	114	148	44	126	132	48	117	113	120	125	128	4824
MR	581	507	735	460	651	372	604	733	667	773	767	801	675	868	735	85	131	248	464	554	674	927	935	1013	879	795	993	623	572	918	646	1010	654	849	912	978	878	740	1006	506	843	1002	834	932	801	926	925	723	34905
NM	51	30	30	32	19	17	2	5	1	30	42	47	39	41	37	2	9	20	19	30	27	43	48	32	35	33	31	25	18	34	23	28	31	41	48	36	39	35	47	29	25	35	29	40	52	37	1	67	1472
NM/CT	18	15	20	27	9	13	1	0	0	15	21	32	19	29	10	0	2	17	8	26	26	31	22	24	25	22	29	16	17	33	17	29	16	32	29	39	27	16	48	12	18	43	31	31	37	21	4	52	1029
RF	18	9	20	34	8	6	7	10	8	21	12	17	10	19	5	0	1	4	16	9	20	12	12	34	14	27	19	11	9	19	14	70	14	14	16	12	16	16	12	2	18	14	11	15	20	8	6	19	708
US	765	803	992	1045	826	774	1290	875	956	1386	1181	1289	1151	1011	1035	323	345	718	976	1285	1309	1250	1330	1326	1246	1230	1488	1058	857	1488	972	1511	1184	1399	1342	1404	1238	1220	1464	858	1203	1510	1006	1323	1246	1310	1206	1165	54169
XA	92	57	78	55	54	42	71	60	40	66	52	71	73	66	69	49	35	55	76	74	75	83	67	73	55	63	58	57	51	67	56	73	60	76	59	80	54	66	62	57	63	71	75	89	68	81	60	53	3087
Total	8955	8809	11200	11284	11490	10718	12596	10891	10471	13487	14494	13931	12831	12328	10848	5325	6755	9215	10844	12706	12743	12792	13253	13414	13219	11971	14192	11486	11964	15997	13576	14665	11030	13053	13324	14240	13032	12712	14809	12004	13851	14954	13884	14923	14061	14473	14165	14680	597645
